# Supplementary material for: Adherence to European Guidelines for Treatment and Management of Pancreatic Exocrine Insufficiency in Chronic Pancreatitis Patients
Source: MDPI journal article supplement (doi:10.3390/jcm10122737), 2021-06-21
Supplement: s1 [file s1]

**Table S1:** Adherence to each quality indicator in the guideline.

| <b>Adherence To Guidelines</b>                                                |                                                    |                                                          |                                                                   |
|-------------------------------------------------------------------------------|----------------------------------------------------|----------------------------------------------------------|-------------------------------------------------------------------|
| <b>Quality indicator (QI)</b>                                                 | <b>Number of patients applicable for guideline</b> | <b>Number of patients treated according to guideline</b> | <b>Percentage of patients treated according to guidelines (%)</b> |
| <b>Screening for etiology of Chronic pancreatitis</b>                         |                                                    |                                                          |                                                                   |
| 1. Alcohol consumption at first visit post 2016                               | 118                                                | 77                                                       | 65.3                                                              |
| 2. Alcohol consumption at last visit                                          | 114                                                | 24                                                       | 21.1                                                              |
| 3. Smoking status at first visit post 2016                                    | 118                                                | 71                                                       | 60.1                                                              |
| 4. Smoking status at last visit                                               | 114                                                | 19                                                       | 16.7                                                              |
| 5. Amylase value at PEI diagnosis                                             | 118                                                | 94                                                       | 79.7                                                              |
| 6. Lipase value at PEI diagnosis                                              | 114                                                | 82                                                       | 71.9                                                              |
| 7. AIP screening                                                              | 60                                                 | 42                                                       | 70.0                                                              |
| 8. Evaluation of family history at time of diagnosis                          | 118                                                | 91                                                       | 77.1                                                              |
| 9. Genetic testing if patient is <20 years or has a family history of disease | 48                                                 | 24                                                       | 50.0                                                              |
| 10. Imaging modality used to establish a diagnosis of CP                      | 118                                                | 115                                                      | 97.5                                                              |
| 11. MDT-conference prior to first visit or shortly after first visit          | 118                                                | 108                                                      | 91.5                                                              |
| <b>Screening for PEI complications</b>                                        |                                                    |                                                          |                                                                   |
| <i>Screening for abnormal malnutritional values</i>                           |                                                    |                                                          |                                                                   |
| 1. Vitamin A at first visit post 2016                                         | 118                                                | 83                                                       | 70.3                                                              |
| 2. Vitamin A at last visit                                                    | 114                                                | 78                                                       | 68.4                                                              |
| 3. Vitamin E at first visit post 2016                                         | 118                                                | 81                                                       | 68.6                                                              |
| 4. Vitamin E at last visit                                                    | 114                                                | 76                                                       | 66.7                                                              |

|                                               |     |     |      |
|-----------------------------------------------|-----|-----|------|
| 5. Vitamin D at first visit post 2016         | 118 | 105 | 89.0 |
| 6. Vitamin D at last visit                    | 114 | 84  | 73.7 |
| 7. Calcium at first visit post 2016           | 118 | 79  | 66.9 |
| 8. Calcium at last visit                      | 114 | 81  | 71.1 |
| 9. Iron at first visit post 2016              | 118 | 74  | 62.7 |
| 10. Iron at last visit                        | 114 | 81  | 71.1 |
| 11. Cobalamine at first visit                 | 118 | 86  | 72.9 |
| 12. Cobalamine at last visit                  | 114 | 80  | 70.1 |
| 13. Folate at first visit post 2016           | 118 | 59  | 50.0 |
| 14. Folate at last visit                      | 114 | 76  | 66.7 |
| 15. INR at first visit post 2016              | 118 | 95  | 80.5 |
| 16. INR at last visit                         | 114 | 79  | 69.3 |
| 17. Cholesterol at first visit post 2016      | 118 | 103 | 87.3 |
| 18. Cholesterol at last visit                 | 114 | 73  | 63.2 |
| 19. Thrombocytes at first visit post 2016     | 118 | 101 | 85.6 |
| 20. Albumin at first visit post 2016          | 118 | 107 | 90.7 |
| <i>Screening for other PEI complications</i>  |     |     |      |
| <i>Screening for stool pattern analysis</i>   |     |     |      |
| 1. Stool frequency at first visit post 2016   | 118 | 52  | 44.1 |
| 2. Bristol value at first visit post 2016     | 118 | 20  | 16.9 |
| 3. Stool frequency at last visit              | 114 | 31  | 27.2 |
| <i>Pain evaluation</i>                        |     |     |      |
| 1. Pain evaluation at first visit post 2016   | 118 | 99  | 83.9 |
| Presence of pain                              |     | 42  |      |
| Pain frequency at first visit post 2016       | 42  | 18  | 42.3 |
| Pain intensity at first visit post 2016       | 42  | 16  | 38.1 |
| Pain characteristics at first visit post 2016 | 42  | 16  | 38.1 |
| 2. Pain evaluation at last visit              | 114 | 73  | 64.0 |
| Presence of pain                              |     | 29  |      |
| Pain frequency at last visit                  | 29  | 13  | 44.8 |
| Pain intensity at last visit                  | 29  | 8   | 27.6 |
| Pain characteristics at last visit            | 29  | 9   | 31.0 |
| <i>Screening for osteoporosis</i>             |     |     |      |

|                                                                                                    |     |     |      |
|----------------------------------------------------------------------------------------------------|-----|-----|------|
| 1. DEXA performed at diagnosis and least once in the last 24 months if diagnosed with osteoporosis | 118 | 55  | 46.6 |
| <i>Screening for BMI</i>                                                                           |     |     |      |
| 1. BMI at first visit post 2016                                                                    | 118 | 81  | 68.6 |
| 2. BMI at last visit                                                                               | 114 | 42  | 36.8 |
| <i>Screening for endocrine insufficiency</i>                                                       |     |     |      |
| 1. HbA1c at first visit post 2016                                                                  | 118 | 80  | 67.8 |
| 2. HbA1c at last visit                                                                             | 114 | 75  | 65.7 |
| <b>Therapy of CP complications</b>                                                                 |     |     |      |
| 1. PERT given according to guidelines                                                              | 118 | 101 | 85.6 |
| <i>Therapy of malnutritional values</i>                                                            |     |     |      |
| 1. Increase of PERT dosage if patient shows symptoms                                               | 29  | 18  | 62.1 |
| 2. Addition of PPI                                                                                 | 18  | 6   | 33.3 |
| 3. Vitamin A                                                                                       | 8   | 2   | 25.0 |
| 4. Vitamin E                                                                                       | 10  | 4   | 40.0 |
| 5. Vitamin D                                                                                       | 11  | 8   | 72.7 |
| 6. Calcium                                                                                         | 5   | 3   | 60.0 |
| 7. Iron                                                                                            | 16  | 5   | 31.3 |
| 8. Cobalamine                                                                                      | 18  | 14  | 77.8 |
| 9. Folate                                                                                          | 6   | 5   | 83.3 |
| <i>Treatment of other PEI complications</i>                                                        |     |     |      |
| 1. Pain therapy according to WHO pain ladder                                                       | 42  | 28  | 66.7 |
| 2. Treatment of osteoporosis                                                                       | 20  | 16  | 80.0 |
| 3. Visit to dietitian                                                                              | 118 | 18  | 15.2 |
| <i>Treatment of diabetes mellitus</i>                                                              |     |     |      |
| 1. Application of DM therapy                                                                       | 34  | 29  | 85.3 |
